# Supplementary material for: Influence of additives on the polymorphic manipulation of organic fluorescent crystals and its mechanism
Source: Royal Society of Chemistry journal article supplement (doi:10.1039/d1ce01285a), 2021-12-20
Supplement: d1ce01285a1.pdf [file d1ce01285a1.pdf]

## Supplementary Information

### Influences and Mechanism of Additives on Polymorphic Manipulation of Organic Fluorescent Crystals

Xiunan Zhang<sup>a</sup>, Jingkang Wang<sup>a,b</sup>, Fei Yu<sup>a</sup>, Xiaowei Cheng<sup>a</sup>, Yunhui Hao<sup>a</sup>, Yue Liu<sup>a</sup>, Xin Huang<sup>a,b</sup>, Ting Wang<sup>a,b\*</sup>, and Hongxun Hao<sup>a,b\*</sup>

<sup>a</sup> National Engineering Research Center of Industrial Crystallization Technology, School of Chemical Engineering and Technology, Tianjin University, Tianjin 300072, China

<sup>b</sup> Collaborative Innovation Center of Chemical Science and Engineering (Tianjin), Tianjin, 300072, China

#### Contents

|                                                          |    |
|----------------------------------------------------------|----|
| Experimental section.....                                | 2  |
| Morphology and Photophysical properties .....            | 4  |
| Molecule packing of Form I and Form II of BMeTTPAL. .... | 6  |
| Reference .....                                          | 14 |

## Experimental section

**1.2. Synthesis Procedure.** BMeTTPAL was readily synthesized by the Jones oxidation<sup>1</sup> and the following Suzuki-Miyaura coupling<sup>2</sup> (Scheme S1). The model compound was characterized and confirmed by 400 MHz <sup>1</sup>H and 100 MHz <sup>13</sup>C spectroscopy (Bruker AVANCE III) and high-resolution mass spectroscopy (HRMS, 1290 UPLC (Agilent)/ microTOF-Q II (Bruker)).

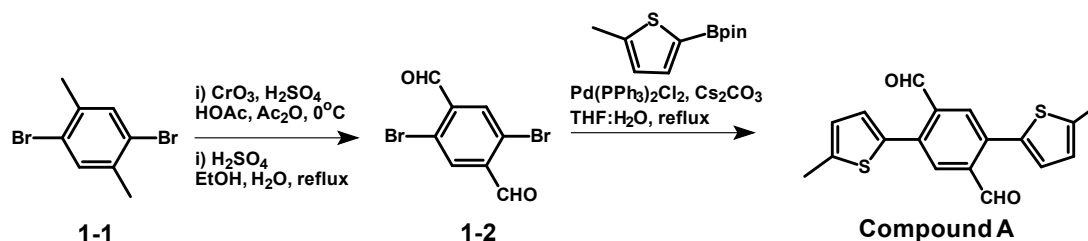

**Scheme S1.** Synthesis of compound A.

Preparation of **1-2** by Jones oxidation<sup>1</sup>: acetic acid (20.0 mL), acetic anhydride (40.0 mL) and 1,4-dibromo-2,5-dimethylbenzene (**1-1**, 4.0 g, 0.015 mol, 1.00 eq.) were added in a flask, then the sulfuric acid (14.0 mL) was added dropwise to this mixture and stirred at  $0\text{ }^\circ\text{C}$ . New grinding  $\text{CrO}_3$  (6.0 g, 0.06 mol, 4.00 eq.) was slowly added in portions and stirred vigorously for another 5 hours at  $0\text{ }^\circ\text{C}$ . After the reaction finished, poured the greenish slurry into ice-water bath and filtered. The filter residue was further washed with ice water and cold methanol (about  $-15\text{ }^\circ\text{C}$ ). Then, the intermediate was carried on hydrolysis reaction under refluxing condition. The relevant solvents are ethanol (20.0 mL), water (20.0 mL) and sulfuric acid (2.0 mL). After cooling the reaction to  $0\text{ }^\circ\text{C}$ , the crude **1-2** was separated by filtration. The pure product was obtained by recrystallization from chloroform in 35% yield.

Preparation of compound A by a Suzuki-Miyaura cross coupling<sup>2</sup>: **1-2** (146 mg, 0.50 mmol, 0.50 eq.),  $\text{Pd}(\text{PPh}_3)_2\text{Cl}_2$  (17.5 mg, 0.03 mmol, 0.03 eq.), substituted-thiophene-2-boronic acid pinacol ester (1.25 mmol, 1.25 eq.) and 1.0 mL  $\text{Cs}_2\text{CO}_3$  (0.82 g, 2.50 mmol, 2.50 eq.) solution (2M) in 5.0 mL dry THF were refluxed 48 hours under an nitrogen atmosphere. After finished, the mixture was extracted with ethyl acetate. The organic phase was further washed with saturated NaCl solution, water and dried with anhydrous  $\text{Mg}_2\text{SO}_4$ . The product was obtained by flash column chromatography or recrystallization in acetone with 85% yield. <sup>1</sup>H NMR (400 MHz,  $\text{CDCl}_3$ )  $\delta$  = 10.27 (s, 2H), 8.08 (s, 2H), 6.91 (d,  $J=3.5$ , 2H), 6.83 (dd,  $J=3.5$ , 1.1, 2H), 2.57 (d,  $J=0.9$ , 6H). <sup>13</sup>C NMR (101 MHz,  $\text{CDCl}_3$ )  $\delta$  = 191.44, 143.32, 136.88, 136.62, 135.06, 130.56, 130.09, 126.42, 15.40. HRMS (m/z):  $[\text{M}+\text{H}]^+$  calcd for  $\text{C}_{18}\text{H}_{14}\text{O}_2\text{S}_2\text{Na}$  349.0333, found 349.0312.

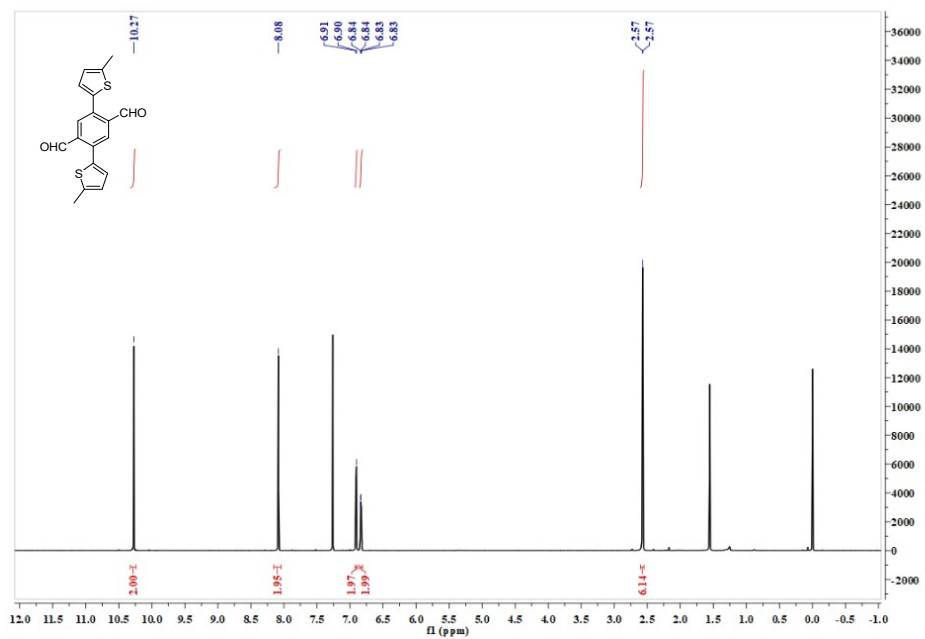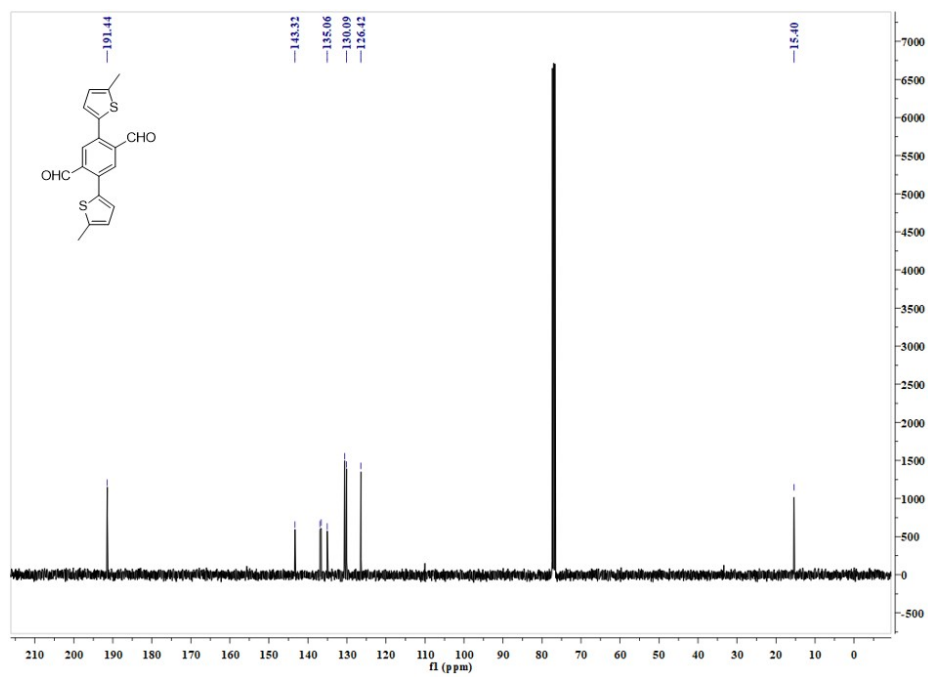

**Fig. S1**  $^1\text{H}$  NMR and  $^{13}\text{C}$  NMR spectrum of 2,5-Bis(5-methyl-2-thienyl)terephthalaldehyde.

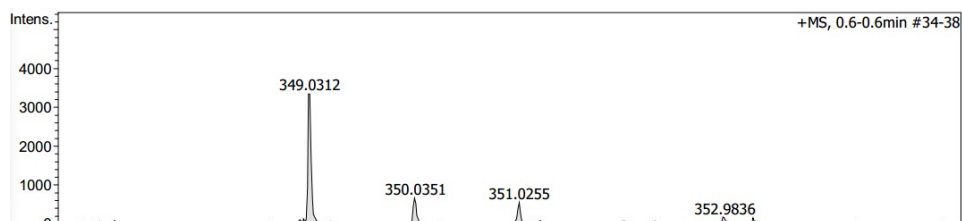

**Fig. S2** High-resolution mass spectrometry (HRMS) spectra of 2,5-Bis(5-methyl-2-thienyl)terephthalaldehyde.

## Morphology and Photophysical properties.

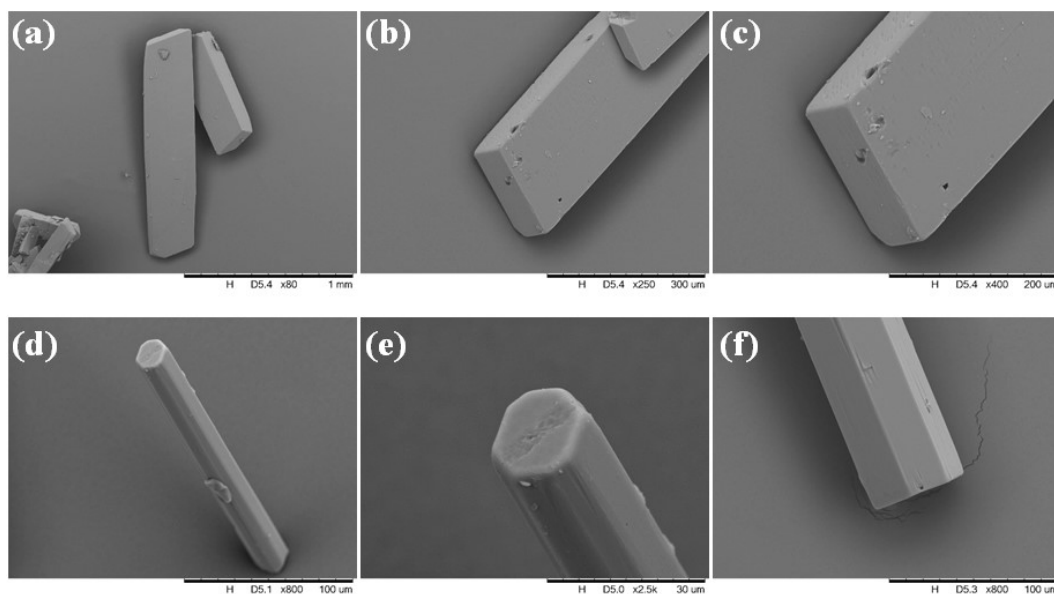

Fig. S3. (a-c) The SEM images of Form I; (d-f) The SEM images of Form II.

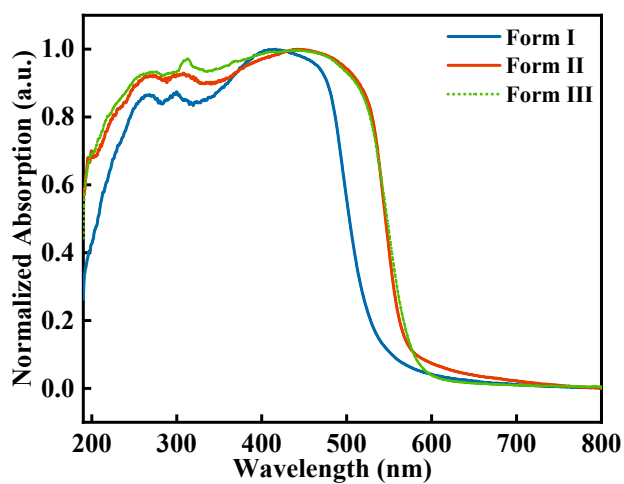

Fig. S4. Normalized UV-vis absorption of Form I, Form II and Form III.

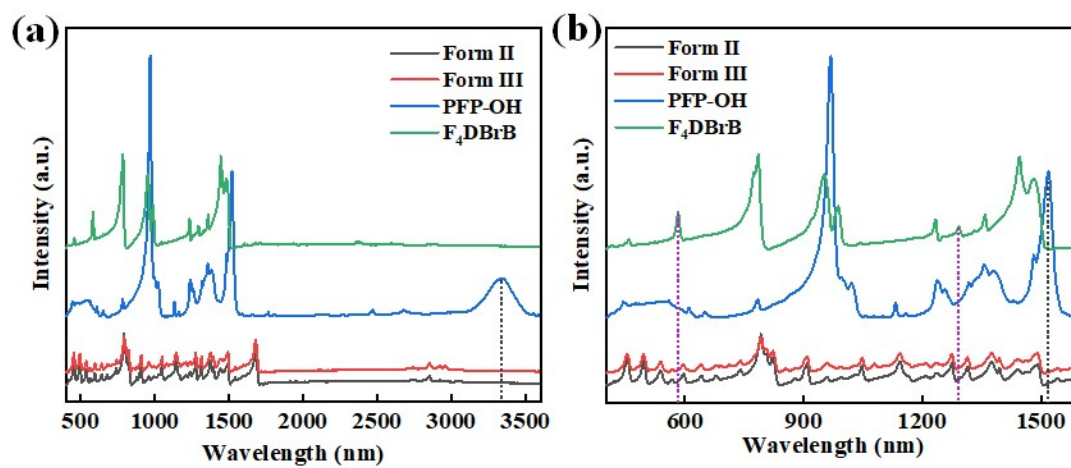

**Fig. S5.** (a) The FTIR spectra of Form II, Form III and additives; (b) The enlarged graphs of (a).

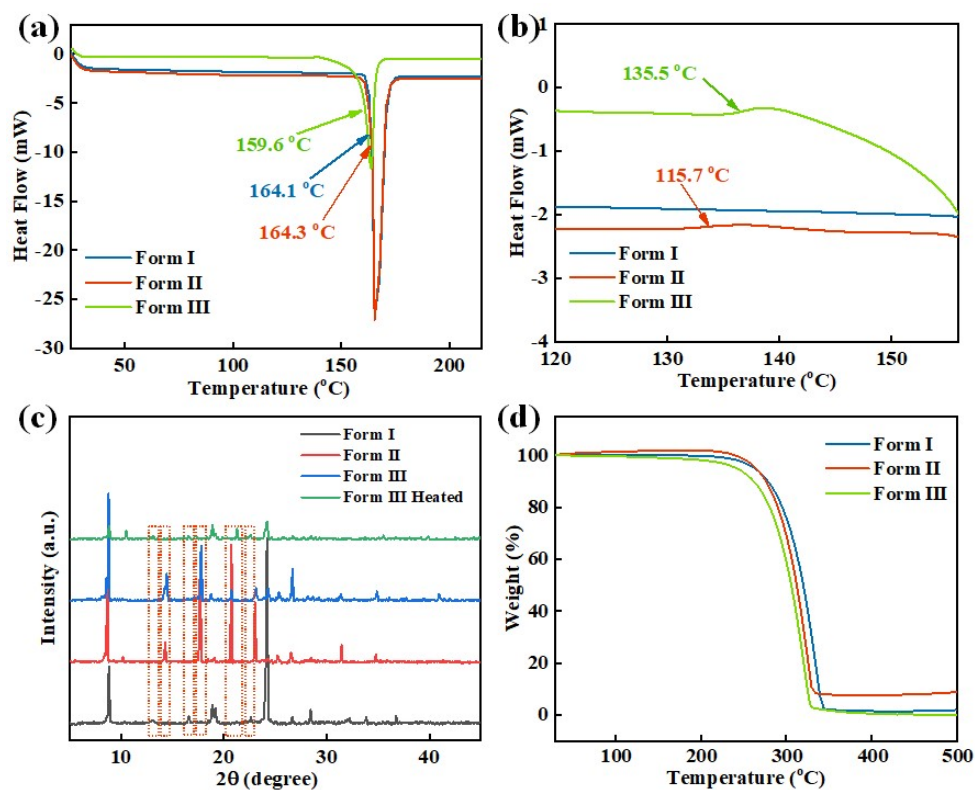

**Fig. S6.** (a) DSC plot of three polymorphs; (b) The enlarged image between 120 °C and 155 °C of the DSC plot; (c) The PXR patterns of different polymorphs: Form I (grey), Form II (red), Form III (blue) and heated powder of FIII (green).

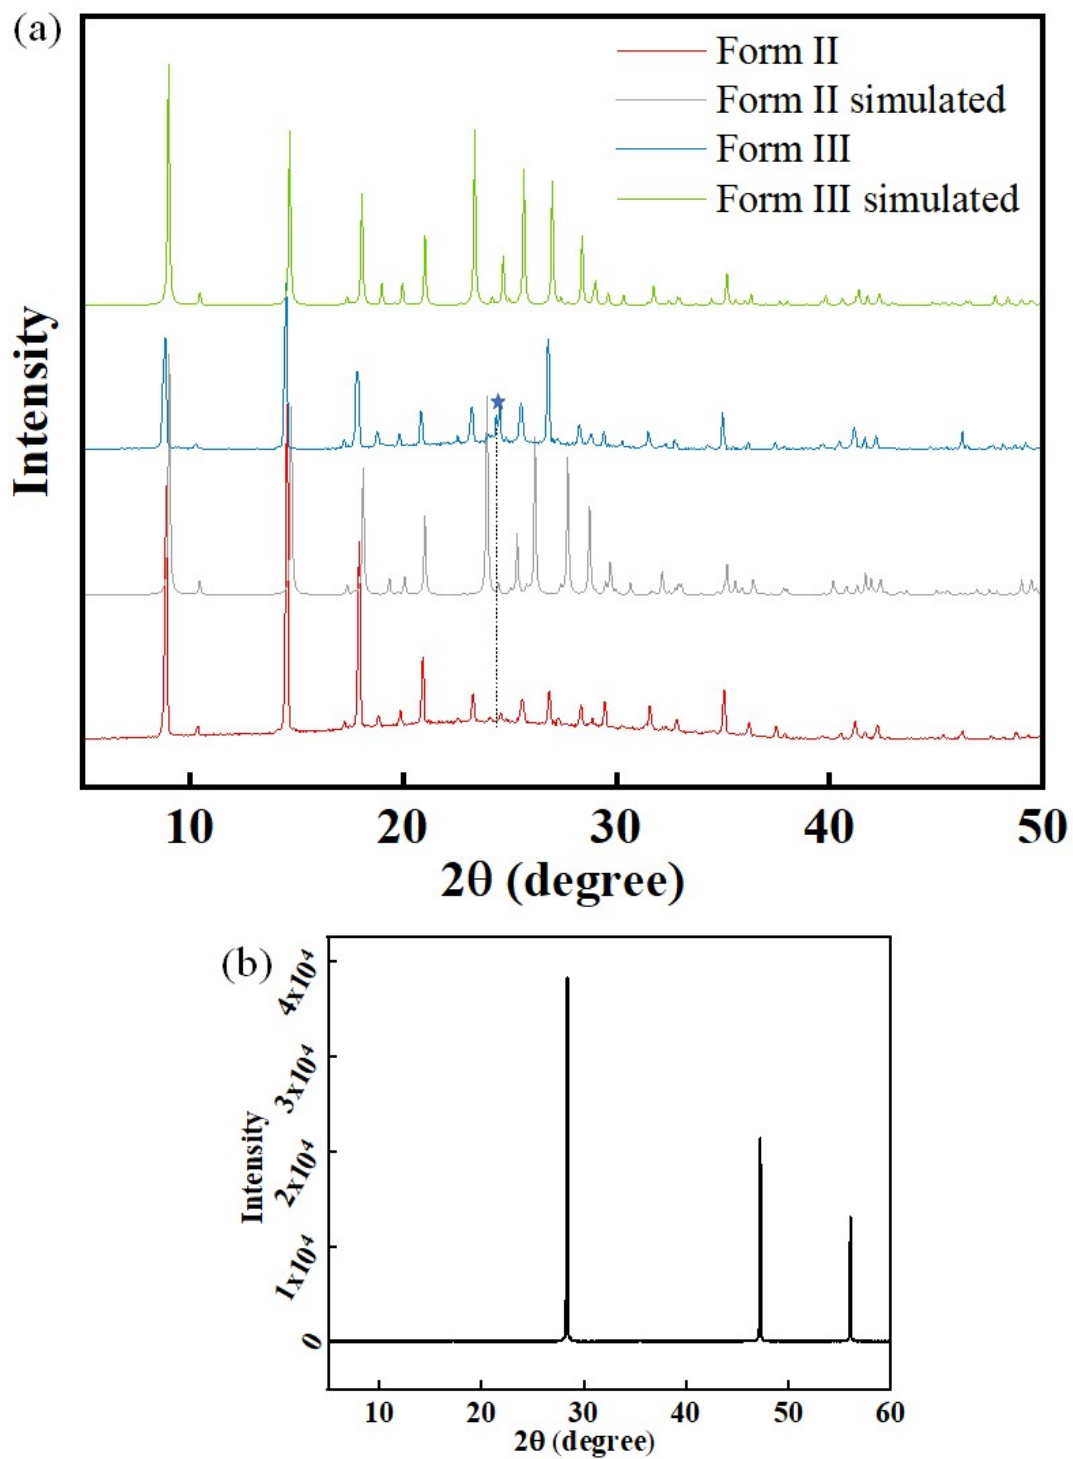

**Fig. S7.** (a) The simulation and experimental comparison diagram of Form II and Form III; (b) the PXRD diagram of standard sample of silicon crystal powder under the same condition of (a).

**Table S1.** The main PXRD data of Form II and Form III under experimental condition.

| Form II ( ° ) | Form III ( ° ) | $\Delta$ |
|---------------|----------------|----------|
| 8.900         | 8.850          | 0.050    |
| 14.560        | 14.510         | 0.050    |
| 17.940        | 17.840         | 0.100    |
| 20.920        | 20.820         | 0.100    |
| 23.270        | 23.220         | 0.050    |
|               | 24.360         |          |
| 24.580        | 24.530         | 0.050    |
| 25.590        | 25.540         | 0.050    |
| 26.850        | 26.800         | 0.050    |
| 28.340        | 28.241         | 0.099    |
| 35.040        | 34.970         | 0.070    |

Note:  $\Delta = \text{Form II ( }^\circ\text{)} - \text{Form III ( }^\circ\text{)}$ ; Experimental condition: 7 °C min<sup>-1</sup>; The process was carried on from 5° to 60° with a step size of 0.01°, 7 °C min<sup>-1</sup>, voltage of 40 kV, and current of 15 mA.

**Table S2.** The PXRD data of standard sample of silicon crystal powder under calibration condition and experimental condition.

| Label    | Theory ( ° ) | Calibration condition ( ° ) | $\Delta_1$ | Experimental condition ( ° ) | $\Delta_2$ |
|----------|--------------|-----------------------------|------------|------------------------------|------------|
| Si (111) | 28.401       | 28.403                      | -0.002     | 28.390                       | 0.011      |
| Si (220) | 47.264       | 47.249                      | 0.015      | 47.260                       | 0.004      |
| Si (311) | 56.083       | 56.068                      | 0.015      | 56.079                       | 0.004      |
| Si (400) | 69.090       | 69.071                      | 0.019      |                              |            |
| Si (331) | 76.336       | 76.315                      | 0.021      |                              |            |
| Si (422) | 87.990       | 87.970                      | 0.022      |                              |            |
| Si (511) | 94.912       | 94.888                      | 0.024      |                              |            |
| Si (440) | 106.670      | 106.641                     | 0.029      |                              |            |
| Si (531) | 114.055      | 114.024                     | 0.030      |                              |            |
| Si (620) | 127.510      | 127.473                     | 0.037      |                              |            |
| Si (533) | 136.861      | 136.819                     | 0.042      |                              |            |

Note:  $\Delta_1 = \text{Theory ( }^\circ\text{)} - \text{Calibration condition ( }^\circ\text{)}$ ;  $\Delta_2 = \text{Theory ( }^\circ\text{)} - \text{Experimental condition ( }^\circ\text{)}$ ; Experimental condition: The process was carried on from 5° to 60° with a step size of 0.01°, 7 °C min<sup>-1</sup>, voltage of 40 kV, and current of 15 mA.

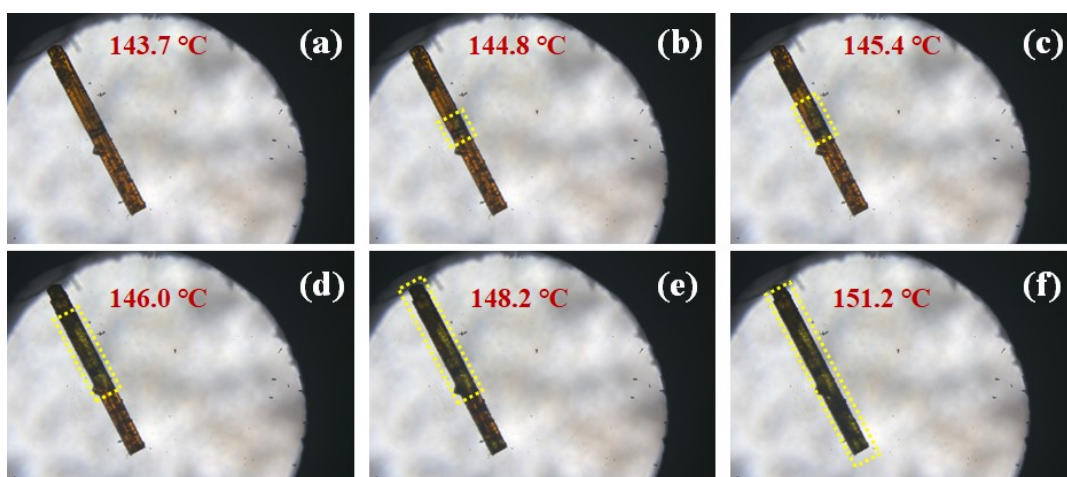

**Fig. S8.** The hot-stage microscopic graphs about the process of crystal transformation between Form III and Form I.

Table S3. The summary of crystallization conditions.

| Crystallization Methods             | Additives                         | Form I | Form II | Form III |
|-------------------------------------|-----------------------------------|--------|---------|----------|
| <b>Evaporation</b>                  | F <sub>4</sub> DBrB<br>≥70% (w/w) | X      | O       | X        |
|                                     | PFP-OH<br>≥10% (w/w)              | X      | O       | X        |
|                                     | None                              | O      | X       | X        |
| <b>Cooling<br/>5 °C/h</b>           | F <sub>4</sub> DBrB<br>≥30% (w/w) | X      | O       | X        |
|                                     | PFP-OH<br>≥5% (w/w)               | X      | O       | X        |
|                                     | None                              | O      | X       | X        |
| <b>Cooling<br/>15 °C/h</b>          | None                              | X      | O       | X        |
| <b>Sublimation<br/>Under Vacuum</b> |                                   | X      | X       | O        |

Note: The solvent for solution crystallization is acetone. The symbol X means not present and the character O means present.

**Molecule packing of Form I and Form II of BMeTTPAL.**



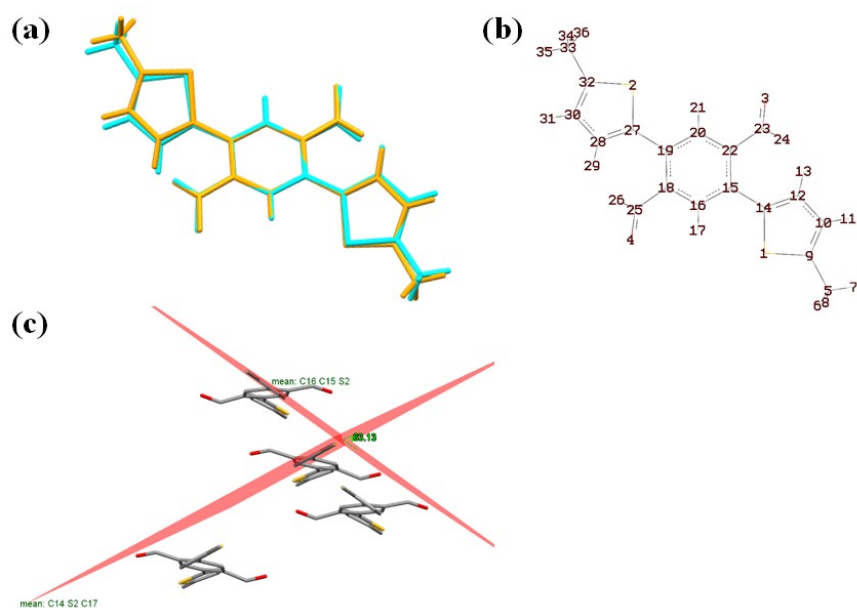

**Fig. S9** (a) Overlay of the molecular conformations of Form I (cyan) and Form II (orange) in the solid state; (b) Atomic labels of BMeTTPAL molecule. (c) The dihedral angle between the substituted thiophene rings of neighboring molecules.<sup>3</sup>

**Table S4.** Crystallographic data of different polymorph of BMeTTPAL.

| cell parameters                                 | Form I <sup>1</sup>                                           | Form II <sup>3</sup>             | Form III                                                      |
|-------------------------------------------------|---------------------------------------------------------------|----------------------------------|---------------------------------------------------------------|
| formula                                         | C <sub>18</sub> H <sub>14</sub> O <sub>2</sub> S <sub>2</sub> | C <sub>9</sub> H <sub>7</sub> OS | C <sub>18</sub> H <sub>14</sub> O <sub>2</sub> S <sub>2</sub> |
| formula mass                                    | 326.41                                                        | 163.21                           | 326.41                                                        |
| crystal system                                  | monoclinic                                                    | monoclinic                       | monoclinic                                                    |
| space group                                     | C c                                                           | I2/a                             | C2/c                                                          |
| <i>a</i> [Å]                                    | 18.3188(8)                                                    | 7.4369(3)                        | 13.921(3)                                                     |
| <i>b</i> [Å]                                    | 11.8244(3)                                                    | 16.8946(6)                       | 16.888(3)                                                     |
| <i>c</i> [Å]                                    | 7.8174(4)                                                     | 12.0074(3)                       | 7.6224(15)                                                    |
| <i>α</i> [°]                                    | 90                                                            | 90                               | 90                                                            |
| <i>β</i> [°]                                    | 116.210(6)                                                    | 92.268(3)                        | 120                                                           |
| <i>γ</i> [°]                                    | 90                                                            | 90                               | 90                                                            |
| <i>V</i> [Å <sup>3</sup> ]                      | 1518.96(13)                                                   | 1507.47(9)                       | 1551.93                                                       |
| <i>Z</i>                                        | 4                                                             | 8                                | 4                                                             |
| <i>μ</i> [mm <sup>-1</sup> ]                    | 0.354                                                         | 0.357                            |                                                               |
| <i>ρ</i> <sub>calcd</sub> [g cm <sup>-3</sup> ] | 1.427                                                         | 1.438                            | 1.397                                                         |
| F [000]                                         | 680.0                                                         | 680.0                            | 680.0                                                         |
| <i>θ</i> [°]                                    | 4.244-52.734                                                  | 4.164-52.736                     | 3.38-27.60                                                    |
| T [K]                                           | 123.15                                                        | 123.15                           | 293(2)                                                        |
| R1                                              | 0.0255                                                        | 0.0292                           | 0.0500                                                        |

|          |        |         |         |
|----------|--------|---------|---------|
| wR2      | 0.0678 | 0.0790  | 0.1241  |
| CCDC No. | 745214 | 1987291 | 2070247 |

**Computer simulation of BMeTTPAL molecule.**

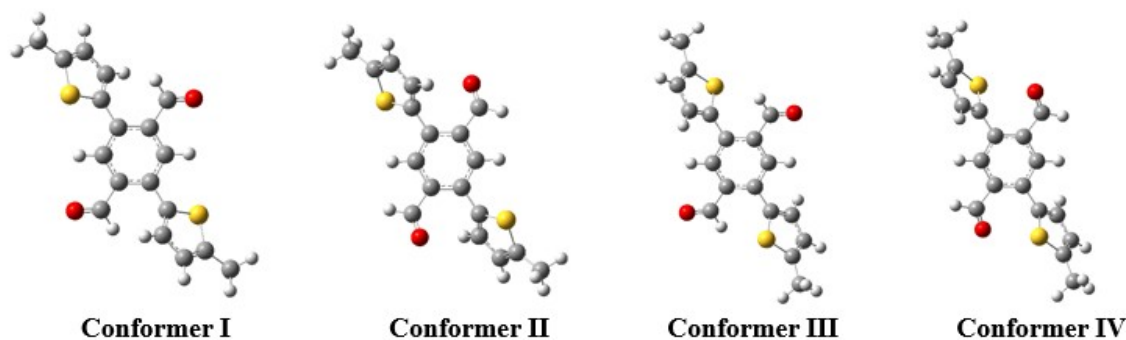

**Fig. S10** Schematic diagram of different conformers of BMeTTPAL molecule in acetone. The energy of conformers, HOMO, LUMO and gap (LUMO-HOMO) can be seen in Table S5 and Figure S9. The calculation was based on M06-2X/6-311G(d,p) level and acetone was used as the solvent for calculations (Solvation Model Based on Density) at the M06-2X/6-311G(d,p) level.

**Table S5.** Energy data of different conformers of BMeTTPAL molecule.

| Solvents     | I            | II           | III          | IV           |
|--------------|--------------|--------------|--------------|--------------|
| Toluene      | -1641.025771 | -1641.014536 | -1641.023030 | -1641.014188 |
| 1,4-Dioxane  | -1641.018699 | -1641.007077 | -1641.015872 | -1641.006693 |
| Chloroform   | -1641.027723 | -1641.017350 | -1641.024746 | -1641.017572 |
| Acetone      | -1641.030041 | -1641.020247 | -1641.026791 | -1641.020773 |
| Acetonitrile | -1641.028984 | -1641.019674 | -1641.025648 | -1641.020134 |

Note: The calculation was based on M06-2X/6-311G (d,p) level by Gaussian 09 software. Unit: Hartree.

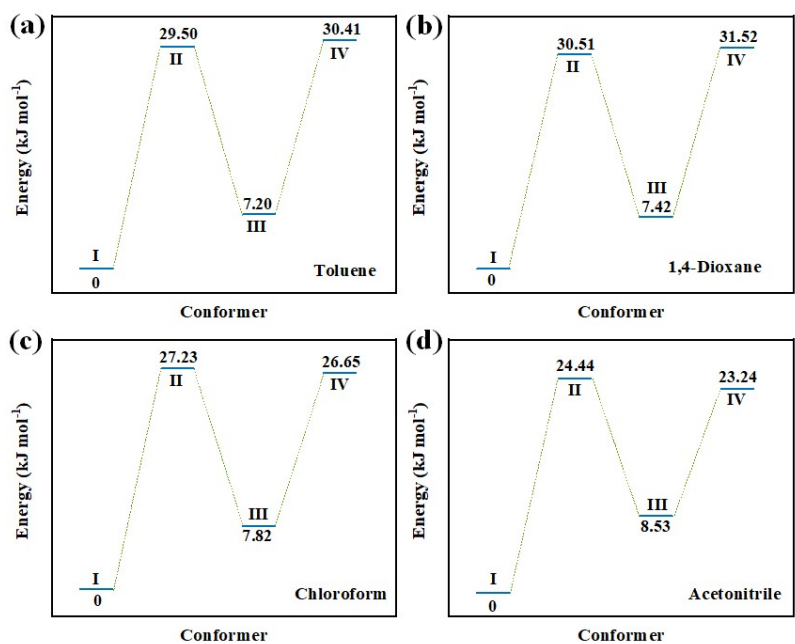

**Fig. S11** (a) The diagram of energy of potential conformations of BMeTTPAL, the lowest energy of conformation I is set as 0 kJ mol<sup>-1</sup> in different solvents.

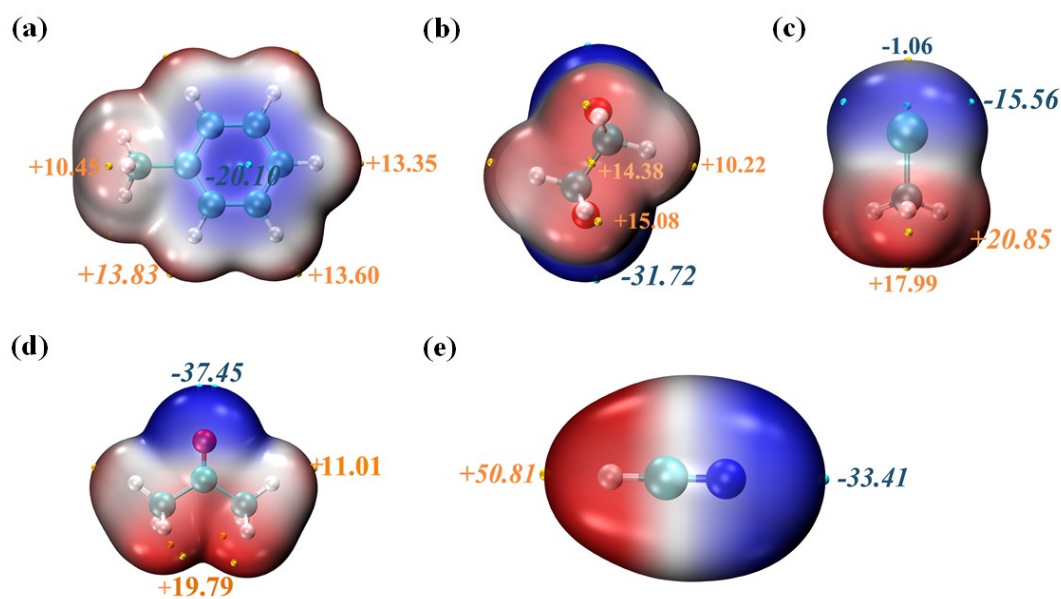

**Fig. S12** ESP-mapped molecular vdW surface of solvent molecules: toluene (a), 1,4-dioxane (b), chloroform (c), acetone (d), acetonitrile (f). Surface local minima and maxima of ESP (units: kcal mol<sup>-1</sup>) are represented as cyan and orange spheres, respectively. The global minimum and maximum values are italic. The calculation was based on M06-2X/6-311G (d,p) level.<sup>4,5</sup>

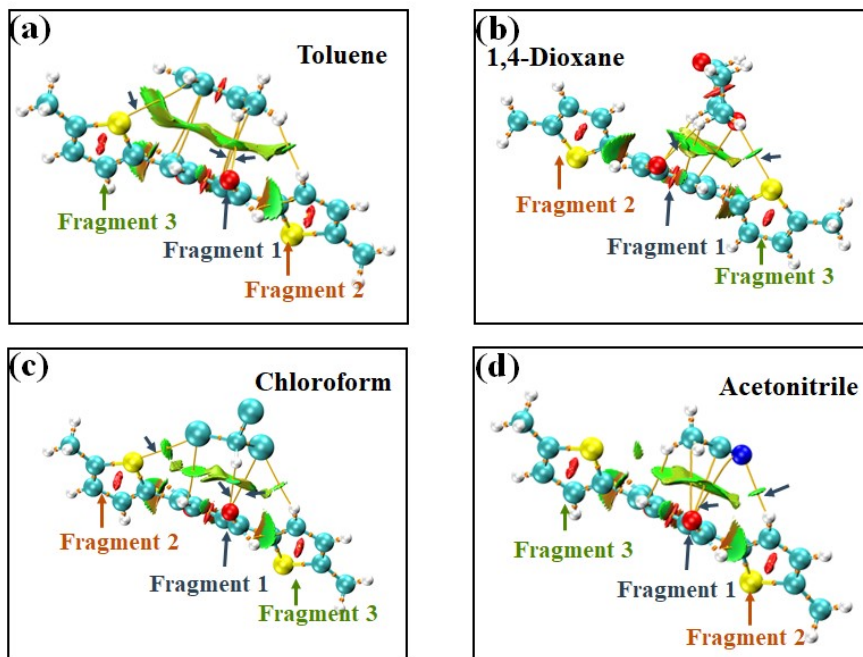

**Fig. S13** The 1:1 complex of CA and toluene (a), 1,4-dioxane (b), chloroform (c), acetonitrile (d). Visualization in the molecular space of non-covalent interaction (NCI isosurfaces corresponding to  $RDG = 0.50$  a.u.) and topological AIM graph in the dimer of CA and acetone. The orange lines represent the bond paths, the orange balls represent the bond critical points (BCPs).

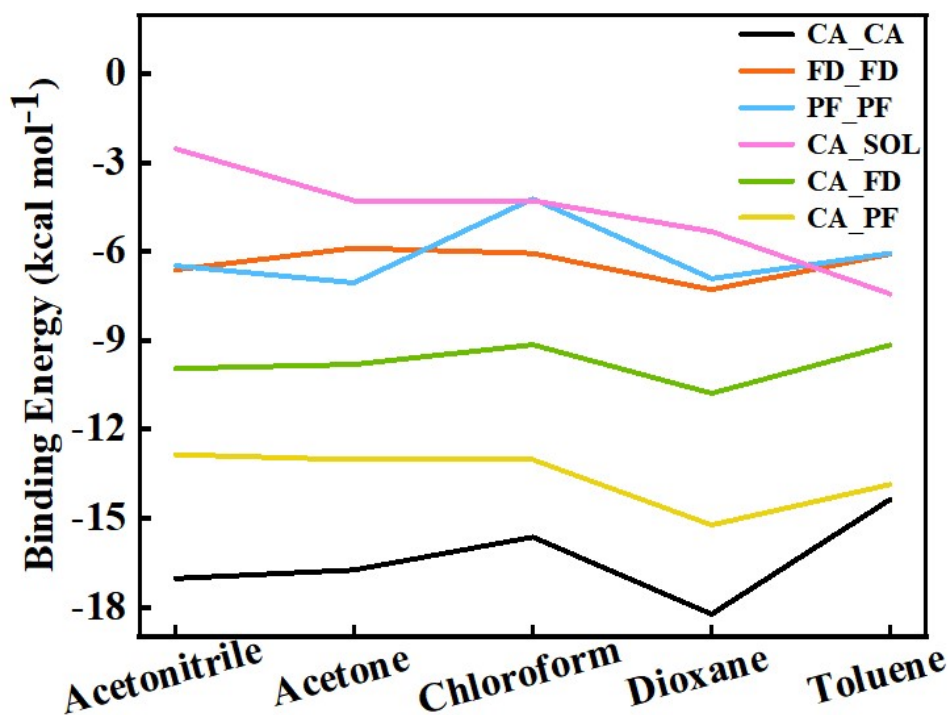

**Fig. S14** The binding energy of 1:1 complex of CA\_CA (black), FD\_FD (orange), PF\_PF (blue), CA\_SOL (purple), CA\_FD (green), CA\_PF (yellow).

**Table S6.** The binding energy of 1:1 complex of CA\_CA, FD\_FD, PF\_PF, CA\_SOL, CA\_FD, CA\_PF.

| Sol    | Toluene                | 1,4-Dioxane            | Chloroform             | Acetone                | Acetonitrile           |
|--------|------------------------|------------------------|------------------------|------------------------|------------------------|
| CA_CA  | -14.36012337<br>967090 | -18.23310183<br>328770 | -15.63680407<br>213100 | -16.74172716<br>165450 | -17.03308437<br>556780 |
| FD_FD  | -6.078728124<br>77417  | -7.285049755<br>27756  | -6.054318072<br>71001  | -5.877349115<br>10594  | -6.613332929<br>24313  |
| PF_PF  | -6.054323140<br>09721  | -6.909338852<br>79240  | -4.216727928<br>19148  | -7.050314076<br>36513  | -6.475250243<br>33575  |
| CA_SOL | -7.429105586<br>33591  | -5.321273864<br>84570  | -4.281371809<br>15833  | -2.773370268<br>17350  | -4.348454451<br>45129  |
| CA_FD  | -9.146966337<br>99917  | -10.78589729<br>925070 | -9.144256408<br>62374  | -9.804530649<br>14504  | -9.946364541<br>03890  |
| CA_PF  | -13.85707088<br>691300 | -15.22403310<br>601880 | -13.02568476<br>957070 | -13.02330613<br>453390 | -12.85043788<br>373980 |

Note: The calculation was based on M06-2X/6-311G (d,p) level by Gaussian 09 software. Unit: kcal mol<sup>-1</sup>.

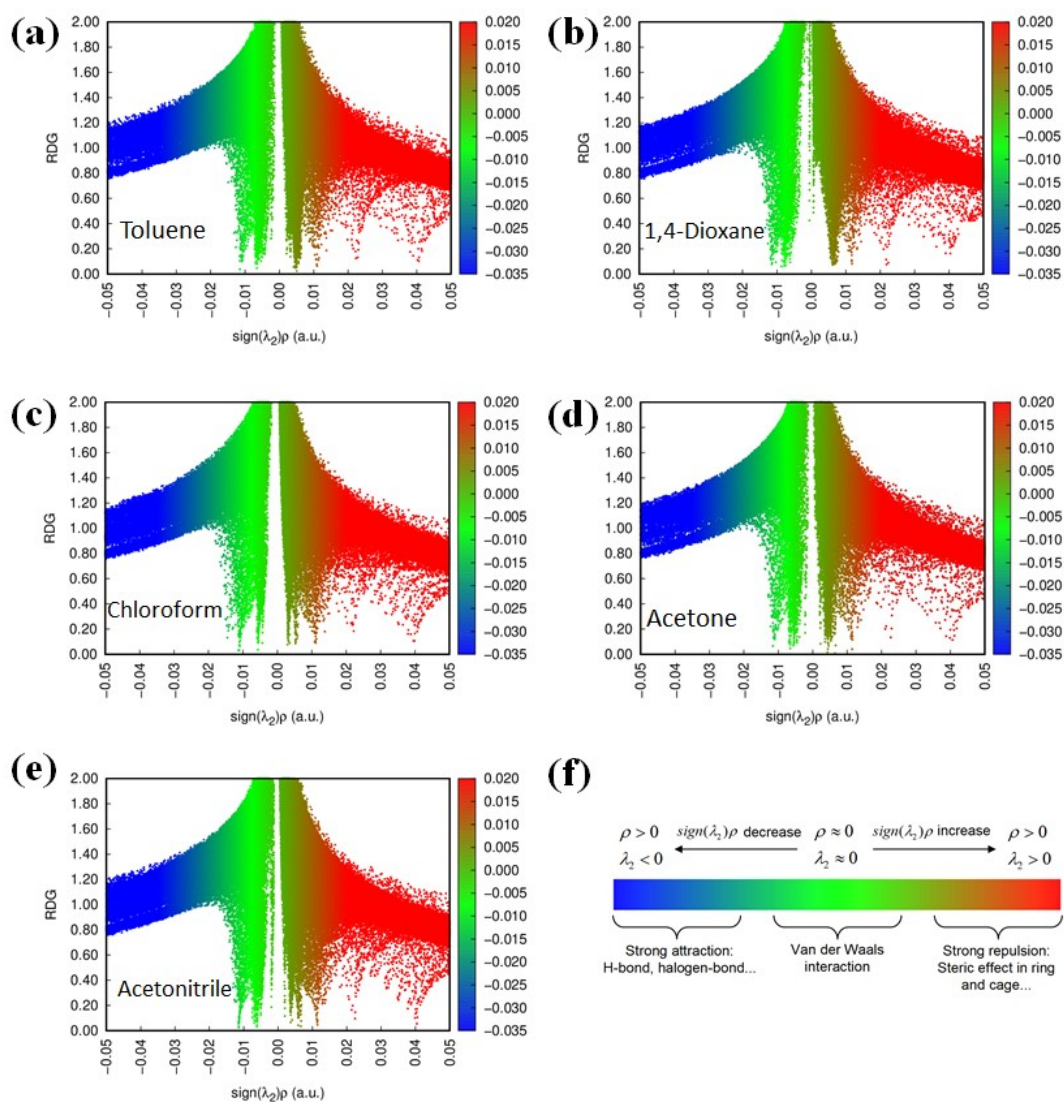

**Fig. S15** Scatter map of non-covalent interaction (NCI) of CA and toluene (a), 1,4-dioxane (b), chloroform (c), acetone (d), acetonitrile (e); Color scale bar related to the color-filled NCI (RDG) isosurface in Fig S10 and Fig S11.

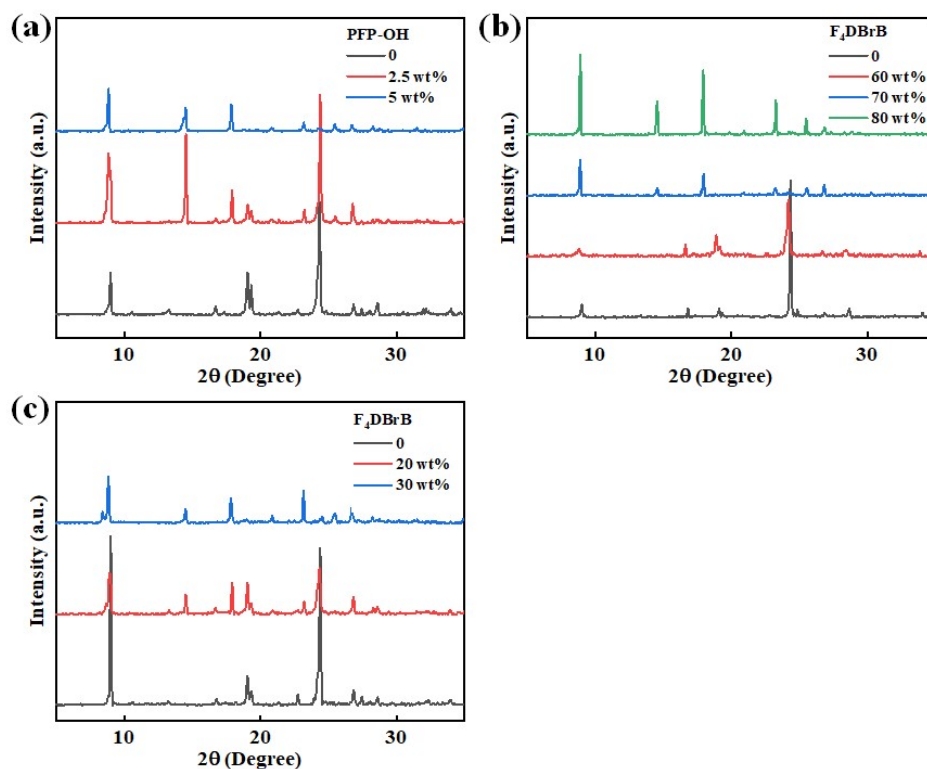

**Fig. S16** (a) The PXR patterns of CA with different concentrations of PFP-OH in acetone in the cooling crystallization process; (b) The PXR patterns of CA with different concentrations of F<sub>4</sub>DBrB in acetone in the evaporation crystallization process; (c) The PXR patterns of CA with different concentrations of F<sub>4</sub>DBrB in acetone in the cooling crystallization process.

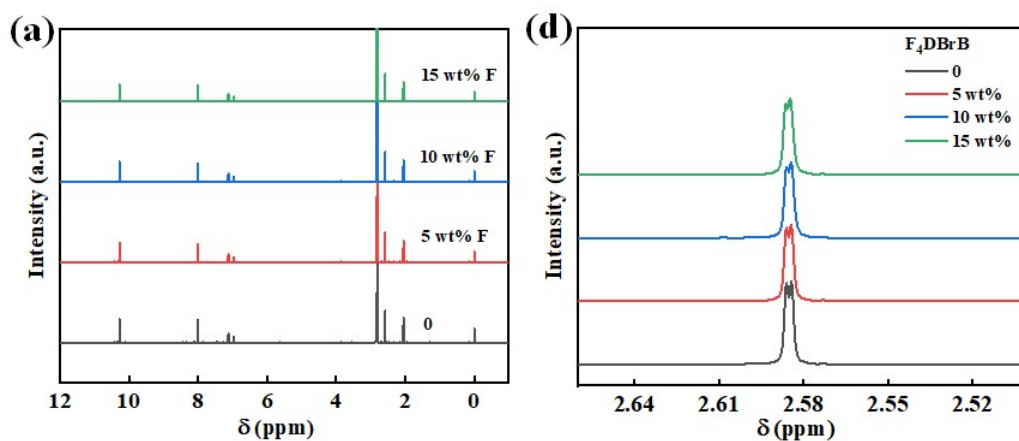

**Fig. S17** (a) The <sup>1</sup>H NMR spectra of CA in *d*<sup>6</sup>-acetone with different concentrations of PFP-OH; (b) Partial enlarged view of (a).

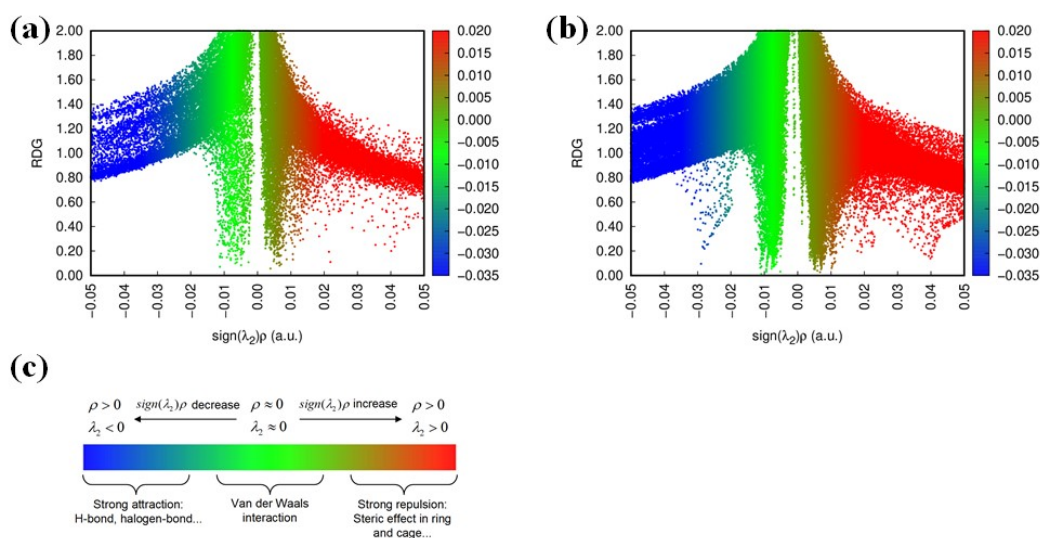

**Fig. S18** Scatter map of non-covalent interaction (NCI) of CA and F4DBrB (a), PFP-OH (b); Color scale bar related to the color-filled NCI (RDG).

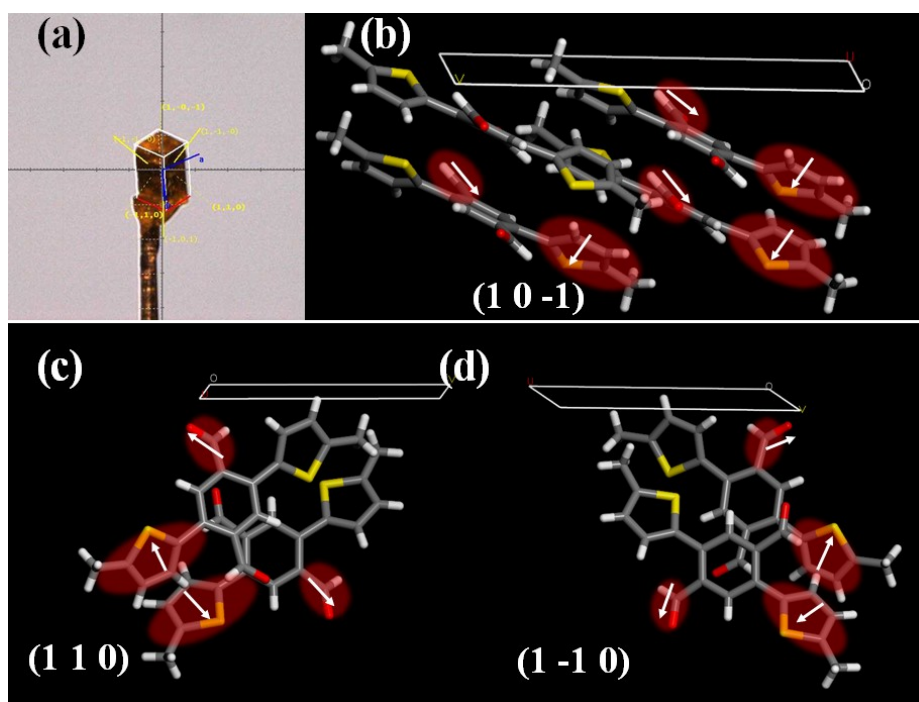

**Fig. S19** (a) Single crystal of Form I with Miller indices of observable faces; (b-d) molecular arrangement in crystal surfaces of (10-1), (110) and (1-10). The red ellipses represent EDG and EWG with large torsion angles, and the white arrows represent the orientation of S and O atoms.



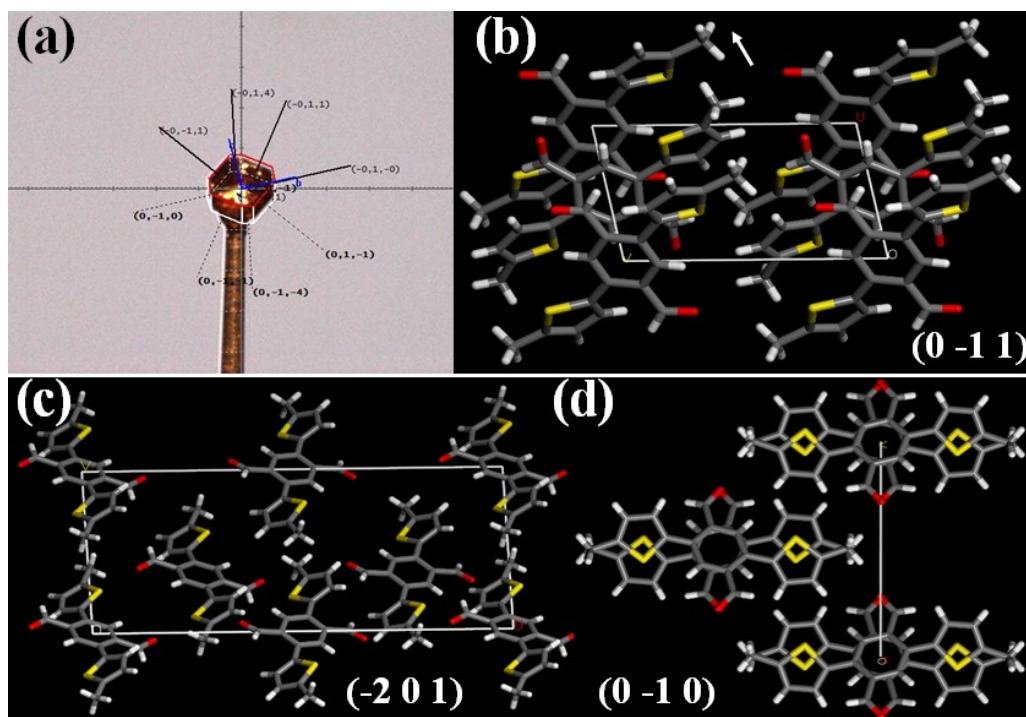

**Fig. S20** (a) Single crystal of Form II with Miller indices of observable faces; (b-d) molecular arrangement in crystal surfaces of (0-11), (-201) and (0-10).

#### Reference

- 1 Pietrangelo, A., Patrick, B. O., MacLachlan, M. J., Wolf, M. O., *J. Org. Chem.*, 2009, **74**, 4918–4926.
- 2 Miao, D., Daigle, M., Lucotti, A., Boismenu-Lavoie, J., *Angew. Chem. Int. Ed.*, 2018, **57**, 3588–3592.
- 3 Zhang, X. N., Wang, J. K., Liu, Y., Hao, Y. H., Yu, F., Li, D. N., Huang, X., Lu, Y., Wang, T., Hao, H. H. Tunable Emission of Organic Fluorescent Crystals through Polymorphic Manipulation. *J. Phys. Chem. C*, 2021, **125**, 6189 – 6199.
- 4 Lu, T., Chen, F., Multiwfn: a multifunctional wavefunction analyzer. *J. Comput. Chem.* 2012, **33**, 580–592.
- 5 Tian Lu, Multiwfn Manual, version 3.6(dev), Section 3.21.1, available at <http://sobereva.com/multiwfn> (accessed Aug 30, 2018).
